# Supplementary material
Source: ML conference proceedings conference paper supplement (https://proceedings.neurips.cc/paper_files/paper/2010/hash/db576a7d2453575f29eab4bac787b919-Abstract.html)
Supplement: Supplementary file 1 [file db576a7d2453575f29eab4bac787b919-Supplemental.zip]

Archive with 1 entries (1 files):
- extra/NIPS2010_1054_extra.pdf
